# Supplementary material for: Catalytic hydrothermal liquefaction of Scenedesmus sp. biomass integrated with dark-fermentation: biocrude and low-carbon fuel production in a biorefinery approach
Source: Royal Society of Chemistry journal article supplement (doi:10.1039/d1se02053f), 2022-01-01
Supplement: d1se02053f1.pdf [file d1se02053f1.pdf]

**Catalytic Hydrothermal Liquefaction of *Scenedesmus* sp. Biomass Integrated with Dark-Fermentation: Bio-crude and Low-Carbon Fuels Production in Biorefinery Approach**

**Harishankar Kopperi<sup>1,2</sup>, Ranaprathap Katakajwala<sup>1,2</sup>, S. Venkata Mohan<sup>1,2\*</sup> □**

<sup>1</sup>Bioengineering and Environmental Sciences (BEES) Lab, Department of Energy and Environmental Engineering, CSIR-Indian Institute of Chemical Technology (CSIR-IICT), Hyderabad, 500007.

<sup>2</sup>Academy of Scientific and Innovative Research (AcSIR), Ghaziabad- 201002, India

\* E-mail: [svmohan@iict.res.in](mailto:svmohan@iict.res.in); [vmohan\\_s@yahoo.com](mailto:vmohan_s@yahoo.com); Tel/Fax: 0091-040-27191765

**Supplementary Information**

**S Table 1: GC-MS product profile of H-HTL and N-HTL Bio-oil**

| RT<br>(min) | Compound                  | Control                    | NaOH | K <sub>2</sub> CO <sub>3</sub> | Ru/C | MoS <sub>2</sub> | Pt/C | Control                    | NaOH | K <sub>2</sub> CO <sub>3</sub> | Ru/C | MoS <sub>2</sub> | Pt/C |
|-------------|---------------------------|----------------------------|------|--------------------------------|------|------------------|------|----------------------------|------|--------------------------------|------|------------------|------|
|             |                           | <b>Nitrogen Atmosphere</b> |      |                                |      |                  |      | <b>Hydrogen Atmosphere</b> |      |                                |      |                  |      |
| 7.97        | 2-<br>Furancarboxaldehyde | 5.21                       |      | 1.27                           |      |                  |      | 8.336                      |      | 1.27                           |      |                  |      |
| 14.42       | Nonane                    |                            |      |                                | 1.06 |                  |      |                            | 2.5  | 6.1                            | 4.6  | 1.6              | 3.6  |
| 14.58       | Tetradecane               | 1.4                        |      |                                |      | 0.52             |      |                            |      |                                | 2.1  | 0.52             |      |
| 14.67       | Phenol                    | 1.73                       |      |                                |      | 0.89             |      | 2.595                      |      | 2.3                            |      | 0.89             |      |
| 14.85       | Benzoic acid              |                            | 2.11 |                                | 2.42 | 3.43             | 1.72 |                            | 2.11 | 1.2                            | 2.42 | 3.43             | 1.72 |
| 14.96       | Heptacosane               |                            | 1.03 |                                |      | 0.92             |      |                            | 1.03 |                                |      | 0.92             |      |
| 15.27       | Dodecanoic acid           |                            | 0.95 |                                | 2.29 | 1.4              | 0.95 |                            | 0.95 |                                | 2.29 | 1.4              | 0.95 |
| 15.66       | Hexadecane                | 2.93                       |      |                                | 2.58 | 2.04             |      | 4.395                      | 6.2  | 6.6                            | 2.58 | 2.04             | 2.8  |
| 15.85       | pentadecane               | 2.2                        |      |                                |      | 0.57             |      | 2.2                        |      |                                |      | 0.57             |      |
| 16.79       | Heptadecane               | 1.65                       | 0.72 | 0.42                           | 0.88 | 1.07             | 0.59 | 1.65                       | 0.72 | 0.42                           | 0.88 | 1.07             | 0.59 |

|       |                    |      |      |      |       |       |       |      |      |      |       |       |       |
|-------|--------------------|------|------|------|-------|-------|-------|------|------|------|-------|-------|-------|
| 17.07 | Hexadecene         | 0.82 |      |      | 5.01  |       |       | 0.82 |      |      | 5.01  |       |       |
| 17.13 | Diethyl Phthalate  | 3.36 |      | 0.29 | 0.87  |       | 2.92  | 3.36 |      | 0.29 | 0.87  |       | 2.92  |
| 17.5  | Tetradecanoic acid |      | 4.56 |      | 5.72  | 3.32  |       |      | 4.56 |      | 5.72  | 3.32  |       |
| 17.82 | Octadecene         |      | 2.35 |      | 3.26  | 3.75  | 1.97  | 4.6  | 2.35 |      | 3.26  | 3.75  | 1.97  |
| 17.82 | Octane             | 4.35 |      |      |       |       |       | 4.35 |      |      |       |       |       |
| 17.88 | Octadecane         | 4.17 | 0.63 | 0.25 | 2.74  | 1.51  | 0.68  |      | 0.63 | 0.25 | 2.74  | 1.51  | 0.68  |
| 18.28 | Decane             | 0.85 |      |      |       |       |       | 0.85 | 2.6  | 6.2  | 9.1   | 8.3   | 4.6   |
| 18.37 | Pentadecanone      |      | 1.23 |      |       |       |       | 6.1  | 1.23 |      |       |       |       |
| 18.6  | Cyclononasiloxane  |      | 4.92 |      | 2     | 0.66  | 4.75  |      | 8.2  |      | 2     | 0.66  | 4.75  |
| 18.85 | Nonadecane         | 0.7  |      |      |       | 0.75  | 1.67  | 0.7  |      |      |       | 0.75  | 1.67  |
| 18.91 | Triacontane        |      |      |      |       | 3.35  |       | 1.5  |      |      |       | 3.35  |       |
| 19.19 | Heneicosane        |      | 1.24 | 0.51 |       | 1.8   |       |      | 1.24 | 0.51 |       | 1.8   |       |
| 19.85 | Propenal           | 0.96 |      |      |       |       |       | 0.96 | 1.7  | 4.5  | 4.5   | 6.1   | 9.1   |
| 19.9  | Cyclopentane       |      |      |      |       | 1.42  |       |      |      |      |       | 1.42  |       |
| 20.66 | Hexadecanoic acid  | 5.7  | 17.8 |      | 23.98 | 16.41 | 21.55 | 5.7  | 17.8 |      | 23.98 | 16.41 | 21.55 |

|       |                    |      |      |      |      |     |      |      |      |      |      |     |      |
|-------|--------------------|------|------|------|------|-----|------|------|------|------|------|-----|------|
| 20.79 | Heptadecanoic acid |      | 2.03 |      |      |     |      |      | 2.03 | 7.6  | 4.9  | 9.1 | 6.3  |
| 21.32 | Eicosane           | 3.52 |      | 1.03 | 2.9  |     | 0.39 | 3.52 | 4.3  | 1.03 | 2.9  |     | 0.39 |
| 21.48 | Octadecanoic acid  | 2.52 |      |      | 5.91 | 2.7 | 5.71 | 2.52 | 4.6  |      | 5.91 | 2.7 | 5.71 |
| 21.6  | Octacosane         |      |      |      | 1.1  | 1   |      | 1.6  |      |      | 1.1  | 1   |      |
| 23.18 | Docosane           | 1.1  |      | 0.48 | 3    |     |      | 1.1  | 2.6  | 0.48 | 4.6  | 4.9 | 5.2  |
| 33.84 | Cyclohexanone      |      |      |      |      |     | 3.26 |      |      |      |      |     | 3.26 |

**S Table 2: N<sub>2</sub>-HRMS product profile HTL-AF**

|                                    | <b>Compound</b>       | <b>Mg/L</b> | <b>Molar Mass</b> | <b>Formula</b>                                  |
|------------------------------------|-----------------------|-------------|-------------------|-------------------------------------------------|
| <b>Control</b>                     | Cellobiose            | 80          | 342               | C <sub>12</sub> H <sub>22</sub> O <sub>11</sub> |
|                                    | Butyrolactone         | 22.5        | 86.08             | C <sub>4</sub> H <sub>6</sub> O <sub>2</sub>    |
|                                    | Fructose              | 162         | 180               | C <sub>6</sub> H <sub>12</sub> O <sub>6</sub>   |
|                                    | HMF                   | 30          | 126.11            | C <sub>6</sub> H <sub>6</sub> O <sub>3</sub>    |
|                                    | Xylose                | 122.5       | 150               | C <sub>5</sub> H <sub>10</sub> O <sub>5</sub>   |
| <b>NaOH</b>                        | 1,6 Anhydrous glucose | 17          | 164               | C <sub>6</sub> H <sub>11</sub> O <sub>5</sub>   |
|                                    | Cellobiose            | 69.5        | 342               | C <sub>12</sub> H <sub>22</sub> O <sub>11</sub> |
|                                    | Fructose              | 425         | 180               | C <sub>6</sub> H <sub>12</sub> O <sub>6</sub>   |
|                                    | Levulinic acid        | 18.5        | 116               | C <sub>5</sub> H <sub>8</sub> O <sub>3</sub>    |
|                                    | Levoglucosenone       | 24.5        | 126               | C <sub>6</sub> H <sub>6</sub> O <sub>3</sub>    |
|                                    | Butyrolactone         | 40.5        | 86.08             | C <sub>4</sub> H <sub>6</sub> O <sub>2</sub>    |
|                                    | Xylose                | 205         | 150               | C <sub>5</sub> H <sub>10</sub> O <sub>5</sub>   |
| <b>K<sub>2</sub>CO<sub>3</sub></b> | Cellobiose            | 21.5        | 342               | C <sub>12</sub> H <sub>22</sub> O <sub>11</sub> |
|                                    | Fructose              | 234         | 180               | C <sub>6</sub> H <sub>12</sub> O <sub>6</sub>   |
|                                    | Levulinic acid        | 47.5        | 116               | C <sub>5</sub> H <sub>8</sub> O <sub>3</sub>    |
|                                    | Furfurol              | 48          | 96.08             | C <sub>5</sub> H <sub>4</sub> O <sub>2</sub>    |
|                                    | Xylose                | 219         | 150               | C <sub>5</sub> H <sub>10</sub> O <sub>5</sub>   |
| <b>MoS<sub>2</sub></b>             | Cellobiose            | 73          | 342               | C <sub>12</sub> H <sub>22</sub> O <sub>11</sub> |
|                                    | Fructose              | 38          | 180               | C <sub>6</sub> H <sub>12</sub> O <sub>6</sub>   |
|                                    | Butyrolactone         | 78          | 86.08             | C <sub>4</sub> H <sub>6</sub> O <sub>2</sub>    |

|             |                       |       |       |                                                 |
|-------------|-----------------------|-------|-------|-------------------------------------------------|
|             | Levulinic acid        | 33.5  | 116   | C <sub>5</sub> H <sub>8</sub> O <sub>3</sub>    |
|             | angalic lactone       | 30.5  | 98.1  | C <sub>5</sub> H <sub>6</sub> O <sub>2</sub>    |
|             | Xylose                | 260.5 | 150   | C <sub>5</sub> H <sub>10</sub> O <sub>5</sub>   |
| <b>Ru/C</b> | 1,6 Anhydrous glucose | 43    | 164   | C <sub>6</sub> H <sub>11</sub> O <sub>5</sub>   |
|             | Fructose              | 365   | 180   | C <sub>6</sub> H <sub>12</sub> O <sub>6</sub>   |
|             | Levoglucosenone       | 86    | 126   | C <sub>6</sub> H <sub>6</sub> O <sub>3</sub>    |
|             | Butyrolactone         | 125   | 86.08 | C <sub>4</sub> H <sub>6</sub> O <sub>2</sub>    |
|             | angalic lactone       | 12.5  | 98.1  | C <sub>5</sub> H <sub>6</sub> O <sub>2</sub>    |
|             | Lactic acid           | 25    | 90.08 | C <sub>3</sub> H <sub>6</sub> O <sub>3</sub>    |
|             | Xylose                | 213   | 150   | C <sub>5</sub> H <sub>10</sub> O <sub>5</sub>   |
|             | Furfurol              | 124   | 96.08 | C <sub>5</sub> H <sub>4</sub> O <sub>2</sub>    |
|             | Cellobiose            | 72.5  | 342   | C <sub>12</sub> H <sub>22</sub> O <sub>11</sub> |
| <b>Pt/C</b> | 1,6 Anhydrous glucose | 145   | 164   | C <sub>6</sub> H <sub>11</sub> O <sub>5</sub>   |
|             | Fructose              | 335.5 | 180   | C <sub>6</sub> H <sub>12</sub> O <sub>6</sub>   |
|             | Levulinic acid        | 30    | 116   | C <sub>5</sub> H <sub>8</sub> O <sub>3</sub>    |
|             | Butyrolactone         | 28    | 86.08 | C <sub>4</sub> H <sub>6</sub> O <sub>2</sub>    |
|             | Furfurol              | 48    | 96.08 | C <sub>5</sub> H <sub>4</sub> O <sub>2</sub>    |
|             | angalic lactone       | 63.5  | 98.1  | C <sub>5</sub> H <sub>6</sub> O <sub>2</sub>    |
|             | Xylose                | 74.5  | 150   | C <sub>5</sub> H <sub>10</sub> O <sub>5</sub>   |

**S Table 3: H<sub>2</sub>- HRMS product profile HTL-AF**

|                                    | <b>Compound</b>       | <b>Mg/L</b> | <b>Mass</b> | <b>Formula</b>                                  |
|------------------------------------|-----------------------|-------------|-------------|-------------------------------------------------|
| <b>Control</b>                     | Cellobiose            | 61          | 342         | C <sub>12</sub> H <sub>21</sub> O <sub>11</sub> |
|                                    | Fructose              | 160         | 180         | C <sub>6</sub> H <sub>11</sub> O <sub>6</sub>   |
|                                    | HMF                   | 45          | 126         | C <sub>6</sub> H <sub>6</sub> O <sub>3</sub>    |
| <b>NaOH</b>                        | 1,6 Anhydrous glucose | 37          | 164         | C <sub>6</sub> H <sub>11</sub> O <sub>5</sub>   |
|                                    | Cellobiose            | 26          | 342         | C <sub>12</sub> H <sub>21</sub> O <sub>11</sub> |
|                                    | Fructose              | 34          | 180         | C <sub>6</sub> H <sub>11</sub> O <sub>6</sub>   |
|                                    | Levenoic acid         | 139         | 116         | C <sub>5</sub> H <sub>7</sub> O <sub>3</sub>    |
|                                    | Levoglucofenone       | 850         | 128         | C <sub>6</sub> H <sub>7</sub> O <sub>3</sub>    |
|                                    | Xylose                | 60          | 150         | C <sub>5</sub> H <sub>9</sub> O <sub>5</sub>    |
| <b>K<sub>2</sub>CO<sub>3</sub></b> | Cellobiose            | 25          | 342         | C <sub>12</sub> H <sub>21</sub> O <sub>11</sub> |
|                                    | Fructose              | 50          | 180         | C <sub>6</sub> H <sub>11</sub> O <sub>6</sub>   |
|                                    | Levenoic acid         | 43          | 116         | C <sub>5</sub> H <sub>7</sub> O <sub>3</sub>    |
|                                    | Xylose                | 60          | 150         | C <sub>5</sub> H <sub>9</sub> O <sub>5</sub>    |
| <b>MoS<sub>2</sub></b>             | Cellobiose            | 250         | 342         | C <sub>12</sub> H <sub>21</sub> O <sub>11</sub> |
|                                    | Fructose              | 95          | 180         | C <sub>6</sub> H <sub>11</sub> O <sub>6</sub>   |
|                                    | Levenoic acid         | 96          | 116         | C <sub>5</sub> H <sub>7</sub> O <sub>3</sub>    |
|                                    | Xylose                | 67          | 150         | C <sub>5</sub> H <sub>9</sub> O <sub>5</sub>    |
| <b>Ru/C</b>                        | 1,6 Anhydrous glucose | 76          | 164         | C <sub>6</sub> H <sub>11</sub> O <sub>5</sub>   |
|                                    | Fructose              | 156         | 180         | C <sub>6</sub> H <sub>11</sub> O <sub>6</sub>   |
|                                    | Levoglucofenone       | 730         | 128         | C <sub>6</sub> H <sub>7</sub> O <sub>3</sub>    |

|             |                       |     |     |                      |
|-------------|-----------------------|-----|-----|----------------------|
|             | Cellobiose            | 426 | 342 | $C_{12}H_{21}O_{11}$ |
| <b>Pt/C</b> | 1,6 Anhydrous glucose | 49  | 164 | $C_6H_{11}O_5$       |
|             | Fructose              | 56  | 180 | $C_6H_{11}O_6$       |
|             | Levenoic acid         | 96  | 116 | $C_5H_7O_3$          |
|             | Xylose                | 81  | 150 | $C_5H_9O_5$          |
